# Supplementary material for: Thermal and compositional driven relaxor ferroelectric behaviours of lead-free Bi0.5Na0.5TiO3–SrTiO3 ceramics
Source: Royal Society of Chemistry journal article supplement (doi:10.1039/c9tc04864b), 2019-12-28
Supplement: c9tc04864b1.pdf [file c9tc04864b1.pdf]

ARTICLE

Supporting information

**Thermal and compositional driven relaxor ferroelectric behaviours of lead-free  $\text{Bi}_{0.5}\text{Na}_{0.5}\text{TiO}_3\text{-SrTiO}_3$  ceramics**

Hongying He,<sup>a</sup> Xin Lu,<sup>a</sup> Minchan Li,<sup>a</sup> Yumei Wang<sup>a</sup>, Zhenrong Li,<sup>b</sup> Zhouguang Lu,<sup>c</sup> and Li Lu<sup>\*a</sup>

<sup>a</sup> Department of Mechanical Engineering, National University of Singapore, 9 Engineering Drive 1, Singapore 117576, Singapore

<sup>b</sup> Electronic Materials Research Laboratory, Key Laboratory of the Ministry of Education & International Center for Dielectric Research, Xi'an Jiaotong University, Xi'an 710049, China

<sup>c</sup> Department of Materials Science and Engineering, South University of Science and Technology of China, Shenzhen 518055, China

**Corresponding Author**

\*E-mail: luli@nus.edu.sg

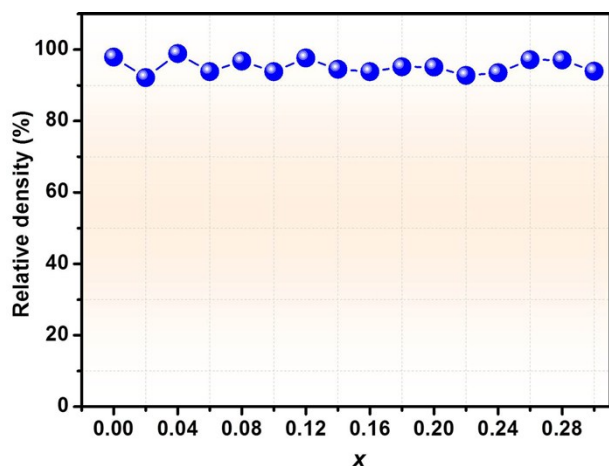

Figure S1. Relative densities of BNT-ST ceramics sintered at optimal temperatures from 1160 °C to 1130 °C.

Figure S1 illustrates the relative densities of BNT-ST ceramics sintered under optimal temperatures, which are in the range of 93% to 98%. The sintering temperature is decreased from 1160 °C to 1130 °C with increasing ST content from 0 to 0.30.

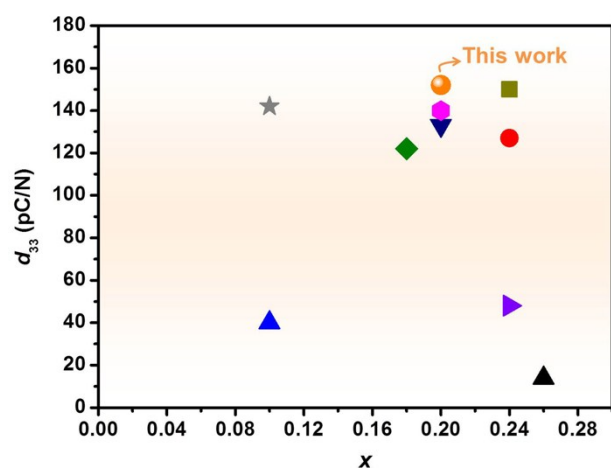

Figure S2. Piezoelectric coefficients ( $d_{33}$ ) against different ST contents in reported (1-x)BNT-100xST ceramics.

The piezoelectric coefficient ( $d_{33}$ ) of reported BNT-ST compositions as well as the  $d_{33}$  value in this work are exhibited in Figure S2. The maximum piezoelectric coefficient of 152 pC N<sup>-1</sup> is obtained at  $x = 0.20$  in this work, which is superior to the reported performances.
